# Supplementary material
Source: MDPI journal article supplement (https://www.mdpi.com/2076-3417/12/3/1261)
Supplement: s1 [file s1]

**A two-step process for improved biomass production and non-destructive  
astaxanthin and carotenoids accumulation in *Haematococcus pluvialis***

Arianna Rizzo<sup>1</sup>, Michael E. Ross<sup>2\*</sup>, Alessandra Norici<sup>3</sup>, Bruno Jesus<sup>1</sup>

<sup>1</sup> Mer Molécules Santé EA 2160, Faculté des Sciences et des Techniques, Université de Nantes, Nantes, France

<sup>2</sup> Scottish Association for Marine Science (SAMS), Scottish Marine Institute, Oban, Argyll, PA37 1QA, UK

<sup>3</sup> Laboratory of Algal and Plant Physiology, Dipartimento di Scienze della Vita e dell'Ambiente, Università Politecnica delle Marche, via Brecce Bianche, 60131 Ancona, Italy

**Corresponding author \*:** [Michael.ross@sams.ac.uk](mailto:Michael.ross@sams.ac.uk)

[Arianna.rizzo@univ-nantes.fr](mailto:Arianna.rizzo@univ-nantes.fr), [a.norici@univpm.it](mailto:a.norici@univpm.it), [Bruno.Jesus@univ-nantes.fr](mailto:Bruno.Jesus@univ-nantes.fr)

## SUPPLEMENTARY 1

### Selection of the best cultivation conditions

Growth of *H. pluvialis* CCAP 34/1D was tested in 3N-BBM+V, BG11, MWC, JM, ([www.CCAP.ac.uk](http://www.CCAP.ac.uk)) cultured at 20°C, 30  $\mu\text{mol photons m}^{-2} \text{s}^{-1}$ , 12:12 hrs D/L photoperiod, 150 rpm over a 37 days period. The maximum growth rate was reached in the JM medium at 7.5 pH (Figure S1). The JM medium and 7.5 pH was therefore selected for *H. pluvialis* 34/1D cultivation in further experiments, 10 mM of HEPES buffer was supplied to control the pH variations.

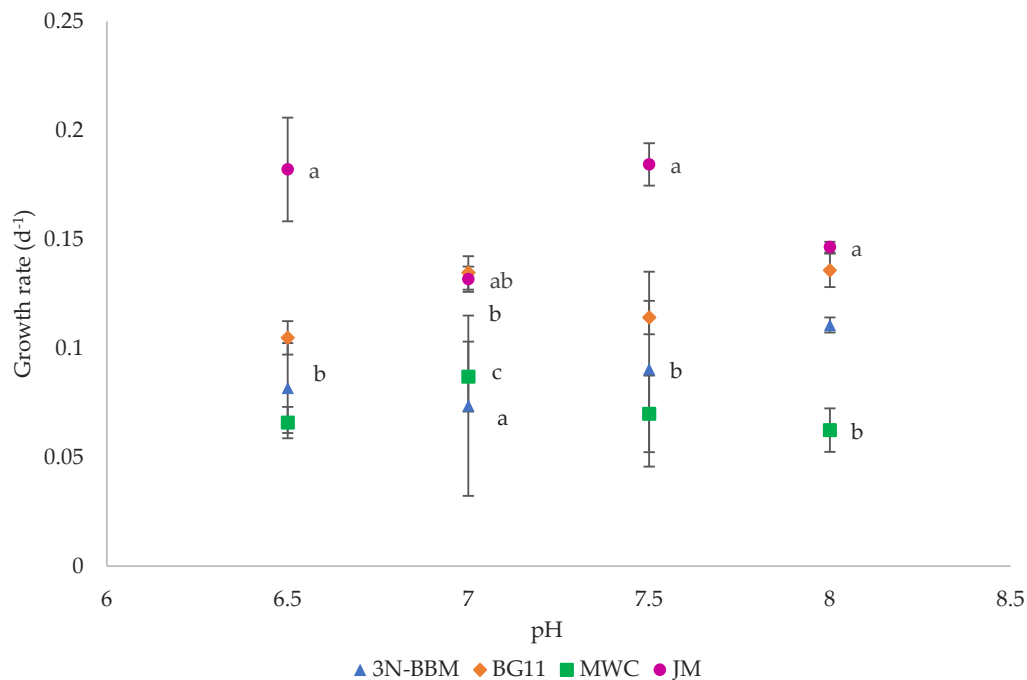

**Figure S1\_ Growth rate of cultures in each different medium 3N-BBM+V+V, BG11, MWC, JM at 6, 6.5, 7, 7.5, 8 pHs. Error bars are standard deviations of the means,  $n=3$ . The letters indicate significant differences between the treatments, at each pH value ( $p < 0.05$ ).**

The best N/P ratio based on growth rate and cell density (Figure S2) was the one originally present in the JM recipe, i.e., in the control.

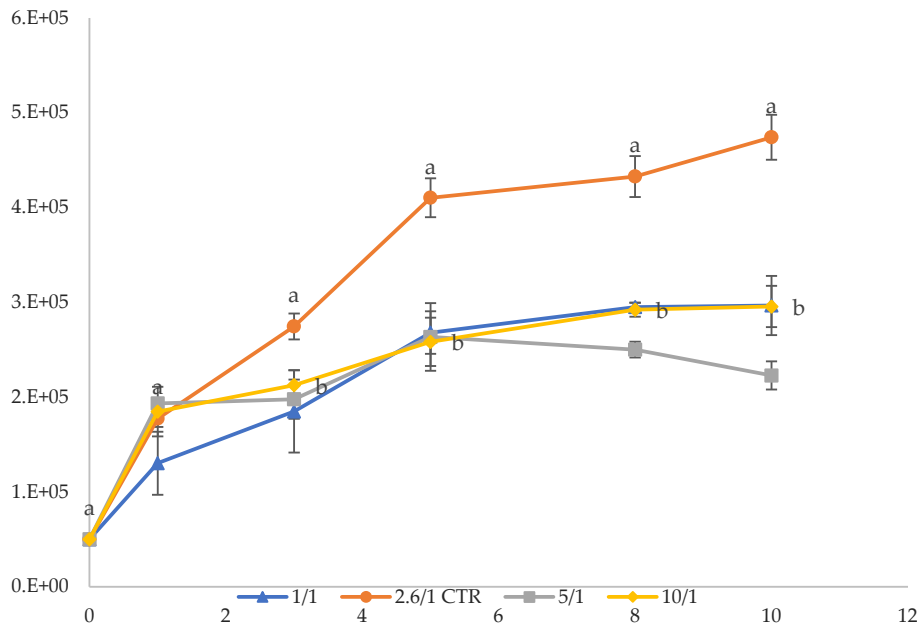

**Figure S2\_ *H. pluvialis* 34/1D grown in different N/P ratios: Control with NaNO<sub>3</sub> 2.6/1; 1/1; 5/1; 10/1. Error bars are standard deviations of the means,  $n=3$ . The letters indicate significant differences between the N/P ratios at each data point ( $p < 0.05$ )**

## SUPPLEMENTARY 2

### Selection of the astaxanthin induction method

The experiment was performed in a 24 well plates with a starting inoculum of 10'000 cells/ml resuspended in a final volume of 2 ml of fresh JM at 7.5 pH. Seven different induction conditions were tested: salinity at different concentrations: 0%, 0.2%, 0.4%, 0.6%, 0.8%, 1%, 1.2% w/v; sodium acetate and sodium pyruvate at the following concentrations: 0%, 0.25%, 0.5%, 1%, 1.5%, 1.75%, 2%. Finally, FeCl<sub>3</sub> at 200 and 400  $\mu\text{M}$  + 0,25% sodium acetate, and FeCl<sub>3</sub> at 200 and 400  $\mu\text{M}$  + 0,25% pyruvate, were tested.

Furthermore, another variant was added: all stressors were applied under medium light (ML) (250  $\mu\text{mol photon m}^{-2}\text{s}^{-1}$ ) and high light (HL) (366  $\mu\text{mol photon m}^{-2}\text{s}^{-1}$ ).

Each treatment was tested in triplicate, controls were made with JM medium exposed to HL and ML.

Multi-well plates were maintained in a CT room and daily manual rotations were carried out to prevent clumping. The OD was measured at 480, 665, 649, 750 nm by the POLARstar Omega plate reader, to measure respectively carotenoids, chlorophyll *a* and *b* and cell growth, over a period of 11 days. The purpose of the experiment was to find the best combination of induction stressor to induce the astaxanthin accumulation and the biomass preservation.

Figure S3 shows the effect of sodium acetate on the carotenoids accumulation (OD<sub>480</sub>) and cell growth (OD<sub>750</sub>). Data refers to the 10<sup>th</sup> day of the experiment, when the maximum absorbance value at the two wavelengths was attained. Indeed, as discussed above, the addition of sodium acetate enhances not only the carotenogenesis but also the cell growth. Thus, a 0.25% w/v concentration was selected for the next experiments.

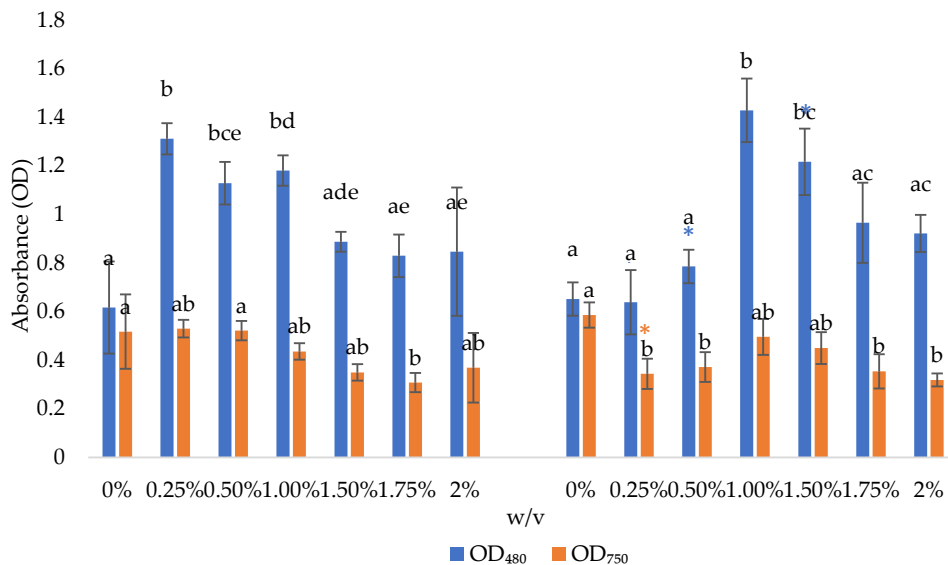

**Figure S3\_ Effect of sodium acetate 0%, 0.25%; 0.5%; 1%; 1.5%; 1.75%; 2% on carotenoids accumulation (OD<sub>480</sub>) and cell density (OD<sub>750</sub>) under ML and HL. Error bars are standard deviations of the means, *n*=3. The letters indicate significant differences between the treatments: OD<sub>480</sub> ML, OD<sub>480</sub> HL, OD<sub>750</sub> ML, OD<sub>750</sub> HL (*p* < 0.05). The asterisk indicates significant differences between the ML and HL treatments (*p* < 0.05)**

The optical density at 750 nm, used to monitor algal growth, was compared with a *H. pluvialis* calibration curve to recover the number of cells/mL (Figure S4).

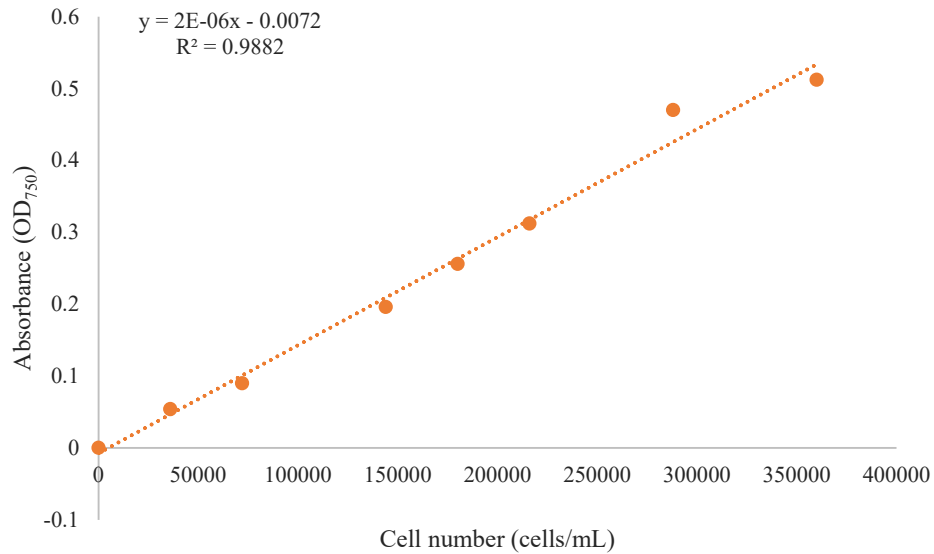

**Figure S4\_ *H. pluvialis* 34/1D calibration curve used for cell quantification ( $n = 3$ , error bars = 1 SD)**

### SUPPLEMENTARY 3

#### Biochemical analyses of the biomass

Biochemical analyses were performed on cultures during both their green and red stages of growth. Cultures were harvested on cultivation day 14 (prior to astaxanthin induction) and at day 21 (7 days following induction). In both instances, cells were centrifuged at 3000 g for 15 minutes; pellets of sub-samples were then flash frozen in liquid nitrogen, stored at  $-80^{\circ}\text{C}$ , and then freeze-dried (ALPHA 1-2 LD plus freeze dryer, Christ).

All biochemical analyses were performed on lyophilized material. Proteins were extracted from 5 mg of dry weight (DW) biomass using a sequential acid and alkaline incubation and quantified using the Lowry assay, as described by Slocombe (2013). Protein concentration was estimated using a  $0\text{-}5\text{ mg L}^{-1}$  BSA (Bovine serum albumin) calibration curve.

Total soluble carbohydrate fraction of the biomass was extracted and quantified using a modified phenol-sulphuric acid method according to Fournier (2001) derived from that by Dubois (1956).

Cell contents of proteins and carbohydrates were expressed as percentage of dry weight (% DW).

Table S1 shows the analysis carbohydrates and proteins content expressed in % DW of cultures grown under different nitrogen sources, during the green and the red phase. Carbohydrate concentration increased after the addition of 0.25% *w/v* sodium acetate in all the tested culturing regimes.

**Table S1\_Biochemical** table reporting the mean value (% DW)  $\pm$  S.D. within samples ( $n = 3$ ). Values are reported as the mean value ( $n = 3$ )  $\pm$  1 S.D. Different letters indicate significant differences among the nitrogen sources within the green and the red phase, while the differences between the green and the red phase in each treatment are denoted by \* ( $p < 0.05$ ).

| .                  | GREEN |                               | RED                           |                                |
|--------------------|-------|-------------------------------|-------------------------------|--------------------------------|
|                    | %DW   | Carbs                         | Carbs                         | Proteins                       |
| NaNO <sub>3</sub>  |       | 10.72 $\pm$ 0.34 <sup>a</sup> | 12.66 $\pm$ 0.29 <sup>a</sup> | *23.74 $\pm$ 0.7 <sup>a</sup>  |
| FeNO <sub>3</sub>  |       | 41.98 $\pm$ 1.07 <sup>c</sup> | 12.47 $\pm$ 0.46 <sup>a</sup> | *51.80 $\pm$ 0.61 <sup>c</sup> |
| Urea               |       | 38.61 $\pm$ 0.1 <sup>d</sup>  | 19.24 $\pm$ 0.56 <sup>b</sup> | *43.22 $\pm$ 0.69 <sup>d</sup> |
| NH <sub>4</sub> Cl |       | 45.25 $\pm$ 1.39 <sup>b</sup> | 10.95 $\pm$ 0.14 <sup>a</sup> | *61.52 $\pm$ 1.15 <sup>b</sup> |

Cultures grown in FeNO<sub>3</sub> and NH<sub>4</sub>Cl as N-source, started to encyst before the induction process, where the iron and the ammonium probably acted as stressors as it is suggested by the higher amount of carbohydrates accumulated in the green phase, in comparison with the cultures grown in urea and in the NaNO<sub>3</sub> control (Table 3).

Under these induction conditions, the macromolecular profile of the cells, in particular the carbohydrate pool, changed according to the nitrogen source and the growth phase.

The protein amount remained nearly constant, thanks to the presence of nitrogen in the medium, except for the cells grown in urea, while the ratio carotenoids/chlorophylls increased in all the treatments.

#### HPLC Chromatograms

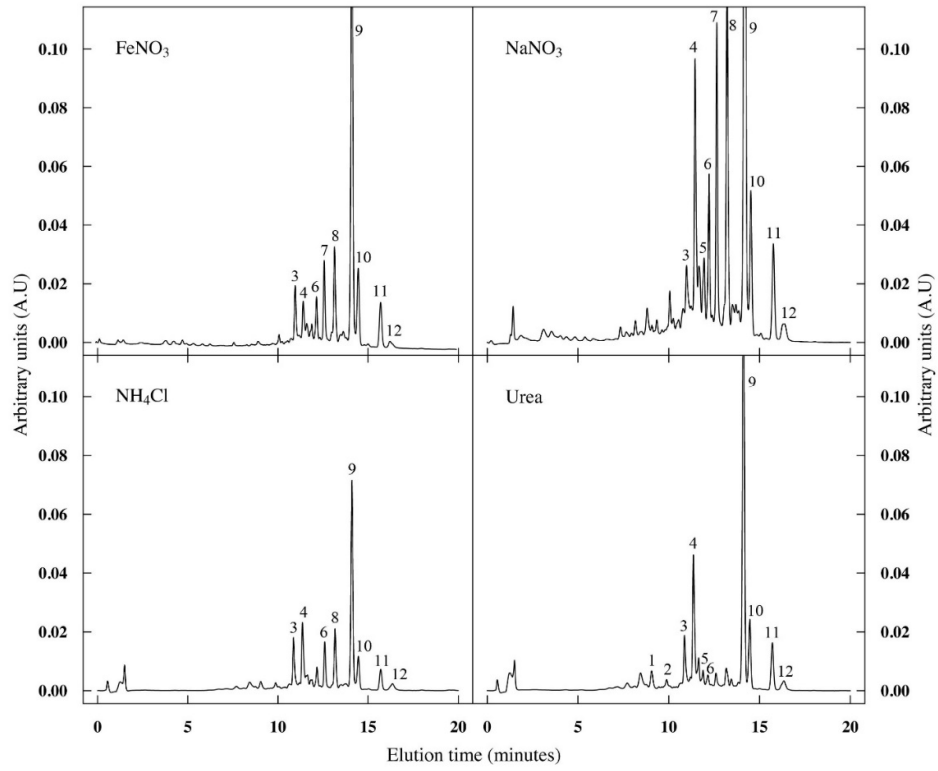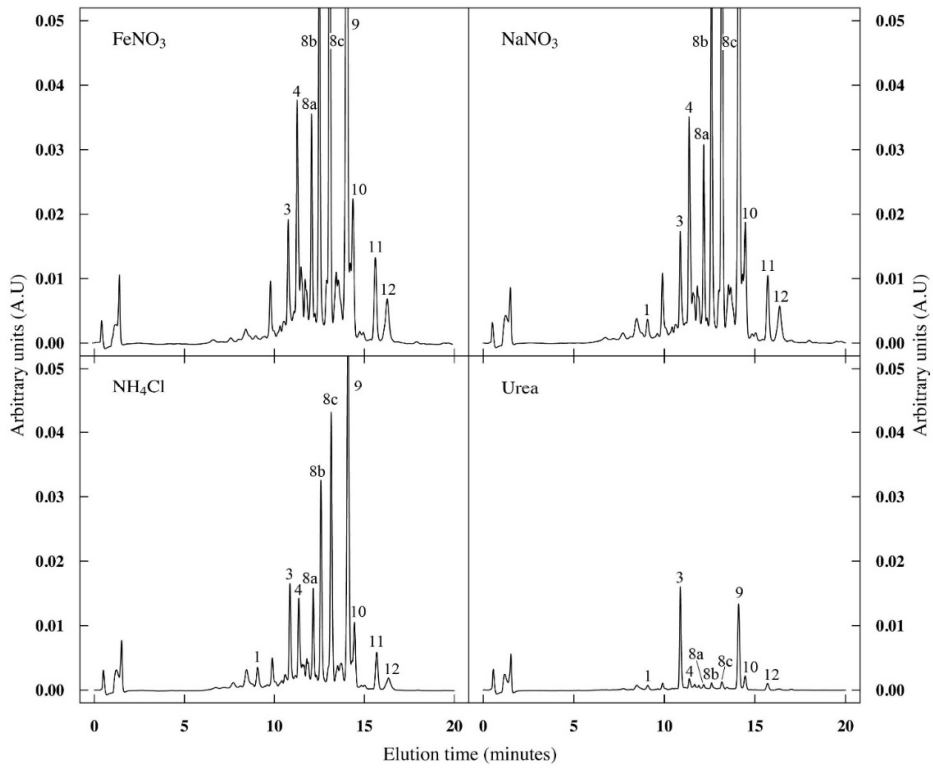

**Figure S5.** Representative HPLC chromatograms of *H. pluvialis* green (A) and red (B) phases of growth, when cultivated under FeNO<sub>3</sub>, NaNO<sub>3</sub>, NH<sub>4</sub>Cl, or Urea as the principal nitrogen source in Jaworski's Media. **Identified peaks:** 1. Antheraxanthin; 2. Echinenone; 3. Internal Standard; 4. Lutein; 5. Neoxanthin; 6. Carotenoid-like; 7. Canthaxanthin; 8a, 8b, 8c. Astaxanthin isomers; 9. Chlorophyll *a*; 10. Chlorophyll *a* epimer; 11. Pheophytin *a*; 12. β-carotene.

### Statistics

**Table S2.** Ordinary one-way ANOVA and Tukey's multiple comparison test, with a single pooled variance were performed for *H. pluvialis*. *H. pluvialis* CCAP 34/1D maximum growth rate and cell density in different NS. ANOVA test was performed for growth rate (a) and cell density (b).

a

| ANOVA table                 | SS       | DF | MS        | F (DFn, DFd)     | P value  |
|-----------------------------|----------|----|-----------|------------------|----------|
| Treatment (between columns) | 0.02340  | 3  | 0.007800  | F (3, 8) = 29.59 | P=0.0001 |
| Residual (within columns)   | 0.002109 | 8  | 0.0002636 |                  |          |
| Total                       | 0.02551  | 11 |           |                  |          |

b

| ANOVA table                 | SS           | DF | MS          | F (DFn, DFd)     | P value  |
|-----------------------------|--------------|----|-------------|------------------|----------|
| Treatment (between columns) | 153913807379 | 3  | 51304602460 | F (3, 8) = 9.854 | P=0.0046 |
| Residual (within columns)   | 41651433356  | 8  | 5206429169  |                  |          |
| Total                       | 195565240735 | 11 |             |                  |          |

**Table S3.** The relative change of *H. pluvialis* CCAP 34/1D cell number based on the number of cells/ml at the beginning and end of the 7 day induction process. Thereby representative of cell number change during the red phase alone. Ordinary one-way ANOVA and Tukey's multiple comparisons test, with a single pooled variance were performed.

| ANOVA table                 | SS    | DF | MS    | F (DFn, DFd)     | P value  |
|-----------------------------|-------|----|-------|------------------|----------|
| Treatment (between columns) | 2528  | 3  | 842.6 | F (3, 8) = 13.47 | P=0.0017 |
| Residual (within columns)   | 500.6 | 8  | 62.58 |                  |          |
| Total                       | 3028  | 11 |       |                  |          |

**Table S4.** Quantitative pigment composition (in mg/g DW), obtained by HPLC analysis, of *H. pluvialis* cells at the end of the green phase, in cultures previously supplied with equimolar concentrations of nitrogen from different sources. Ordinary one-way ANOVA and Tukey's multiple comparisons test, with a single pooled variance were performed.

HPLC green

| Test details                                       | Mean 1  | Mean 2  | Mean Diff. | SE of diff. | N1 | N2 | q       | DF    |
|----------------------------------------------------|---------|---------|------------|-------------|----|----|---------|-------|
| LUTEIN                                             |         |         |            |             |    |    |         |       |
| NaNO <sub>3</sub> vs. FeNO <sub>3</sub>            | 0.07843 | 0.06883 | 0.009595   | 0.3072      | 1  | 1  | 0.04417 | 54.00 |
| NaNO <sub>3</sub> vs. UREA                         | 0.07843 | 0.2778  | -0.1993    | 0.3072      | 1  | 1  | 0.9177  | 54.00 |
| NaNO <sub>3</sub> vs. NH <sub>4</sub> <sup>+</sup> | 0.07843 | 0.07202 | 0.006408   | 0.3072      | 1  | 1  | 0.02950 | 54.00 |
| FeNO <sub>3</sub> vs. UREA                         | 0.06883 | 0.2778  | -0.2089    | 0.3072      | 1  | 1  | 0.9619  | 54.00 |
| FeNO <sub>3</sub> vs. NH <sub>4</sub> <sup>+</sup> | 0.06883 | 0.07202 | -0.003187  | 0.3072      | 1  | 1  | 0.01467 | 54.00 |
| UREA vs. NH <sub>4</sub> <sup>+</sup>              | 0.2778  | 0.07202 | 0.2057     | 0.3072      | 1  | 1  | 0.9472  | 54.00 |
| ASTAXANTHIN                                        |         |         |            |             |    |    |         |       |



|                                                    |             |             |             |        |   |   |            |       |
|----------------------------------------------------|-------------|-------------|-------------|--------|---|---|------------|-------|
| NaNO <sub>3</sub> vs. FeNO <sub>3</sub>            | 0.2270      | 2.714       | -2.487      | 0.3072 | 1 | 1 | 11.45      | 54.00 |
| NaNO <sub>3</sub> vs. UREA                         | 0.2270      | -6.661e-016 | 0.2270      | 0.3072 | 1 | 1 | 1.045      | 54.00 |
| NaNO <sub>3</sub> vs. NH <sub>4</sub> <sup>+</sup> | 0.2270      | 0.2993      | -0.07229    | 0.3072 | 1 | 1 | 0.3328     | 54.00 |
| FeNO <sub>3</sub> vs. UREA                         | 2.714       | -6.661e-016 | 2.714       | 0.3072 | 1 | 1 | 12.50      | 54.00 |
| FeNO <sub>3</sub> vs. NH <sub>4</sub> <sup>+</sup> | 2.714       | 0.2993      | 2.415       | 0.3072 | 1 | 1 | 11.12      | 54.00 |
| UREA vs. NH <sub>4</sub> <sup>+</sup>              | -6.661e-016 | 0.2993      | -0.2993     | 0.3072 | 1 | 1 | 1.378      | 54.00 |
| CHL A                                              |             |             |             |        |   |   |            |       |
| NaNO <sub>3</sub> vs. FeNO <sub>3</sub>            | 2.682       | 2.722       | -0.04013    | 0.3072 | 1 | 1 | 0.1848     | 54.00 |
| NaNO <sub>3</sub> vs. UREA                         | 2.682       | 2.212       | 0.4703      | 0.3072 | 1 | 1 | 2.165      | 54.00 |
| NaNO <sub>3</sub> vs. NH <sub>4</sub> <sup>+</sup> | 2.682       | 1.132       | 1.550       | 0.3072 | 1 | 1 | 7.135      | 54.00 |
| FeNO <sub>3</sub> vs. UREA                         | 2.722       | 2.212       | 0.5104      | 0.3072 | 1 | 1 | 2.350      | 54.00 |
| FeNO <sub>3</sub> vs. NH <sub>4</sub> <sup>+</sup> | 2.722       | 1.132       | 1.590       | 0.3072 | 1 | 1 | 7.320      | 54.00 |
| UREA vs. NH <sub>4</sub> <sup>+</sup>              | 2.212       | 1.132       | 1.080       | 0.3072 | 1 | 1 | 4.970      | 54.00 |
| B CAROTENE                                         |             |             |             |        |   |   |            |       |
| NaNO <sub>3</sub> vs. FeNO <sub>3</sub>            | 0.01667     | 0.03083     | -0.01416    | 0.3072 | 1 | 1 | 0.06518    | 54.00 |
| NaNO <sub>3</sub> vs. UREA                         | 0.01667     | 0.08992     | -0.07325    | 0.3072 | 1 | 1 | 0.3372     | 54.00 |
| NaNO <sub>3</sub> vs. NH <sub>4</sub> <sup>+</sup> | 0.01667     | 0.01321     | 0.003461    | 0.3072 | 1 | 1 | 0.01593    | 54.00 |
| FeNO <sub>3</sub> vs. UREA                         | 0.03083     | 0.08992     | -0.05909    | 0.3072 | 1 | 1 | 0.2720     | 54.00 |
| FeNO <sub>3</sub> vs. NH <sub>4</sub> <sup>+</sup> | 0.03083     | 0.01321     | 0.01762     | 0.3072 | 1 | 1 | 0.08112    | 54.00 |
| UREA vs. NH <sub>4</sub> <sup>+</sup>              | 0.08992     | 0.01321     | 0.07671     | 0.3072 | 1 | 1 | 0.3531     | 54.00 |
| PHEO A                                             |             |             |             |        |   |   |            |       |
| NaNO <sub>3</sub> vs. FeNO <sub>3</sub>            | 0.3760      | 1.083       | -0.7072     | 0.3072 | 1 | 1 | 3.256      | 54.00 |
| NaNO <sub>3</sub> vs. UREA                         | 0.3760      | 0.3246      | 0.05145     | 0.3072 | 1 | 1 | 0.2369     | 54.00 |
| NaNO <sub>3</sub> vs. NH <sub>4</sub> <sup>+</sup> | 0.3760      | 0.1655      | 0.2106      | 0.3072 | 1 | 1 | 0.9695     | 54.00 |
| FeNO <sub>3</sub> vs. UREA                         | 1.083       | 0.3246      | 0.7587      | 0.3072 | 1 | 1 | 3.493      | 54.00 |
| FeNO <sub>3</sub> vs. NH <sub>4</sub> <sup>+</sup> | 1.083       | 0.1655      | 0.9178      | 0.3072 | 1 | 1 | 4.225      | 54.00 |
| UREA vs. NH <sub>4</sub> <sup>+</sup>              | 0.3246      | 0.1655      | 0.1591      | 0.3072 | 1 | 1 | 0.7326     | 54.00 |
| ANTERA                                             |             |             |             |        |   |   |            |       |
| NaNO <sub>3</sub> vs. FeNO <sub>3</sub>            | -3.331e-016 | -4.441e-016 | 1.110e-016  | 0.3072 | 1 | 1 | 5.111e-016 | 54.00 |
| NaNO <sub>3</sub> vs. UREA                         | -3.331e-016 | 0.2939      | -0.2939     | 0.3072 | 1 | 1 | 1.353      | 54.00 |
| NaNO <sub>3</sub> vs. NH <sub>4</sub> <sup>+</sup> | -3.331e-016 | 6.661e-016  | -9.992e-016 | 0.3072 | 1 | 1 | 4.600e-015 | 54.00 |
| FeNO <sub>3</sub> vs. UREA                         | -4.441e-016 | 0.2939      | -0.2939     | 0.3072 | 1 | 1 | 1.353      | 54.00 |
| FeNO <sub>3</sub> vs. NH <sub>4</sub> <sup>+</sup> | -4.441e-016 | 6.661e-016  | -1.110e-015 | 0.3072 | 1 | 1 | 5.111e-015 | 54.00 |
| UREA vs. NH <sub>4</sub> <sup>+</sup>              | 0.2939      | 6.661e-016  | 0.2939      | 0.3072 | 1 | 1 | 1.353      | 54.00 |
| CAROTENOID-LIKE                                    |             |             |             |        |   |   |            |       |
| NaNO <sub>3</sub> vs. FeNO <sub>3</sub>            | 1.690       | 2.260       | -0.5700     | 0.3072 | 1 | 1 | 2.624      | 54.00 |
| NaNO <sub>3</sub> vs. UREA                         | 1.690       | 3.090       | -1.400      | 0.3072 | 1 | 1 | 6.445      | 54.00 |
| NaNO <sub>3</sub> vs. NH <sub>4</sub> <sup>+</sup> | 1.690       | 0.3900      | 1.300       | 0.4344 | 1 | 1 | 4.232      | 54.00 |
| FeNO <sub>3</sub> vs. UREA                         | 2.260       | 3.090       | -0.8300     | 0.3072 | 1 | 1 | 3.821      | 54.00 |
| FeNO <sub>3</sub> vs. NH <sub>4</sub> <sup>+</sup> | 2.260       | 0.3900      | 1.870       | 0.4344 | 1 | 1 | 6.088      | 54.00 |
| UREA vs. NH <sub>4</sub> <sup>+</sup>              | 3.090       | 0.3900      | 2.700       | 0.4344 | 1 | 1 | 8.790      | 54.00 |

**Table S5.** For canthaxanthin, a t-test was used to determine if there is a significant difference between the means of two groups, NaNO<sub>3</sub> and FeNO<sub>3</sub>.

| Table Analyzed                      | Canthaxanthin     |
|-------------------------------------|-------------------|
| Column B                            | NaNO <sub>3</sub> |
| vs.                                 | vs.               |
| Column A                            | FeNO <sub>3</sub> |
| Unpaired t test                     |                   |
| P value                             | 0.4961            |
| P value summary                     | ns                |
| Significantly different (P < 0.05)? | No                |
| One- or two-tailed P value?         | Two-tailed        |

t, df

t=0.7479, df=4

**Table S6.** Quantitative pigment composition (in mg/g DW), obtained by HPLC analysis, of *H. pluvialis* cells at the end of the red phases stationary phase, in cultures previously supplied with equimolar concentrations of nitrogen from different sources. Ordinary one-way ANOVA and Tukey's multiple comparisons test, with a single pooled variance were performed.

HPLC red

| Test details                                       | Mean 1   | Mean 2   | Mean Diff. | SE of diff. | N1 | N2 | q       | DF    |
|----------------------------------------------------|----------|----------|------------|-------------|----|----|---------|-------|
| <b>LUTEIN</b>                                      |          |          |            |             |    |    |         |       |
| FeNO <sub>3</sub> vs. NH <sub>4</sub> <sup>+</sup> | 0.07600  | 0.04300  | 0.03300    | 0.2118      | 1  | 1  | 0.2203  | 48.00 |
| FeNO <sub>3</sub> vs. UREA                         | 0.07600  | 0.003000 | 0.07300    | 0.2118      | 1  | 1  | 0.4874  | 48.00 |
| FeNO <sub>3</sub> vs. NaNO <sub>3</sub>            | 0.07600  | 0.04600  | 0.03000    | 0.2118      | 1  | 1  | 0.2003  | 48.00 |
| NH <sub>4</sub> <sup>+</sup> vs. UREA              | 0.04300  | 0.003000 | 0.04000    | 0.2118      | 1  | 1  | 0.2671  | 48.00 |
| NH <sub>4</sub> <sup>+</sup> vs. NaNO <sub>3</sub> | 0.04300  | 0.04600  | -0.003000  | 0.2118      | 1  | 1  | 0.02003 | 48.00 |
| UREA vs. NaNO <sub>3</sub>                         | 0.003000 | 0.04600  | -0.04300   | 0.2118      | 1  | 1  | 0.2871  | 48.00 |
| <b>ASTAXANTHIN</b>                                 |          |          |            |             |    |    |         |       |
| FeNO <sub>3</sub> vs. NH <sub>4</sub> <sup>+</sup> | 1.353    | 0.4860   | 0.8670     | 0.2118      | 1  | 1  | 5.788   | 48.00 |
| FeNO <sub>3</sub> vs. UREA                         | 1.353    | 0.3130   | 1.040      | 0.2118      | 1  | 1  | 6.943   | 48.00 |
| FeNO <sub>3</sub> vs. NaNO <sub>3</sub>            | 1.353    | 0.7110   | 0.6420     | 0.2118      | 1  | 1  | 4.286   | 48.00 |
| NH <sub>4</sub> <sup>+</sup> vs. UREA              | 0.4860   | 0.3130   | 0.1730     | 0.2118      | 1  | 1  | 1.155   | 48.00 |
| NH <sub>4</sub> <sup>+</sup> vs. NaNO <sub>3</sub> | 0.4860   | 0.7110   | -0.2250    | 0.2118      | 1  | 1  | 1.502   | 48.00 |
| UREA vs. NaNO <sub>3</sub>                         | 0.3130   | 0.7110   | -0.3980    | 0.2118      | 1  | 1  | 2.657   | 48.00 |
| <b>CHL A</b>                                       |          |          |            |             |    |    |         |       |
| FeNO <sub>3</sub> vs. NH <sub>4</sub> <sup>+</sup> | 1.664    | 1.396    | 0.2680     | 0.2118      | 1  | 1  | 1.789   | 48.00 |
| FeNO <sub>3</sub> vs. UREA                         | 1.664    | 0.1810   | 1.483      | 0.2118      | 1  | 1  | 9.901   | 48.00 |
| FeNO <sub>3</sub> vs. NaNO <sub>3</sub>            | 1.664    | 0.8120   | 0.8520     | 0.2118      | 1  | 1  | 5.688   | 48.00 |
| NH <sub>4</sub> <sup>+</sup> vs. UREA              | 1.396    | 0.1810   | 1.215      | 0.2118      | 1  | 1  | 8.112   | 48.00 |
| NH <sub>4</sub> <sup>+</sup> vs. NaNO <sub>3</sub> | 1.396    | 0.8120   | 0.5840     | 0.2118      | 1  | 1  | 3.899   | 48.00 |
| UREA vs. NaNO <sub>3</sub>                         | 0.1810   | 0.8120   | -0.6310    | 0.2118      | 1  | 1  | 4.213   | 48.00 |
| <b>B CAROTENE</b>                                  |          |          |            |             |    |    |         |       |
| FeNO <sub>3</sub> vs. NH <sub>4</sub> <sup>+</sup> | 0.02900  | 0.02300  | 0.006000   | 0.2118      | 1  | 1  | 0.04006 | 48.00 |
| FeNO <sub>3</sub> vs. UREA                         | 0.02900  | 0.003000 | 0.02600    | 0.2118      | 1  | 1  | 0.1736  | 48.00 |
| FeNO <sub>3</sub> vs. NaNO <sub>3</sub>            | 0.02900  | 0.01700  | 0.01200    | 0.2118      | 1  | 1  | 0.08012 | 48.00 |
| NH <sub>4</sub> <sup>+</sup> vs. UREA              | 0.02300  | 0.003000 | 0.02000    | 0.2118      | 1  | 1  | 0.1335  | 48.00 |
| NH <sub>4</sub> <sup>+</sup> vs. NaNO <sub>3</sub> | 0.02300  | 0.01700  | 0.006000   | 0.2118      | 1  | 1  | 0.04006 | 48.00 |
| UREA vs. NaNO <sub>3</sub>                         | 0.003000 | 0.01700  | -0.01400   | 0.2118      | 1  | 1  | 0.09347 | 48.00 |
| <b>PHEO A</b>                                      |          |          |            |             |    |    |         |       |
| FeNO <sub>3</sub> vs. NH <sub>4</sub> <sup>+</sup> | 0.2320   | 0.5600   | -0.3280    | 0.2118      | 1  | 1  | 2.190   | 48.00 |
| FeNO <sub>3</sub> vs. UREA                         | 0.2320   | 0.000    | 0.2320     | 0.2118      | 1  | 1  | 1.549   | 48.00 |
| FeNO <sub>3</sub> vs. NaNO <sub>3</sub>            | 0.2320   | 0.1070   | 0.1250     | 0.2118      | 1  | 1  | 0.8345  | 48.00 |
| NH <sub>4</sub> <sup>+</sup> vs. UREA              | 0.5600   | 0.000    | 0.5600     | 0.2118      | 1  | 1  | 3.739   | 48.00 |
| NH <sub>4</sub> <sup>+</sup> vs. NaNO <sub>3</sub> | 0.5600   | 0.1070   | 0.4530     | 0.2118      | 1  | 1  | 3.024   | 48.00 |
| UREA vs. NaNO <sub>3</sub>                         | 0.000    | 0.1070   | -0.1070    | 0.2118      | 1  | 1  | 0.7144  | 48.00 |
| <b>ANTERA</b>                                      |          |          |            |             |    |    |         |       |
| FeNO <sub>3</sub> vs. NH <sub>4</sub> <sup>+</sup> | 0.000    | 0.05200  | -0.05200   | 0.2118      | 1  | 1  | 0.3472  | 48.00 |
| FeNO <sub>3</sub> vs. UREA                         | 0.000    | 0.01500  | -0.01500   | 0.2118      | 1  | 1  | 0.1001  | 48.00 |
| FeNO <sub>3</sub> vs. NaNO <sub>3</sub>            | 0.000    | 0.01000  | -0.01000   | 0.2118      | 1  | 1  | 0.06676 | 48.00 |
| NH <sub>4</sub> <sup>+</sup> vs. UREA              | 0.05200  | 0.01500  | 0.03700    | 0.2118      | 1  | 1  | 0.2470  | 48.00 |
| NH <sub>4</sub> <sup>+</sup> vs. NaNO <sub>3</sub> | 0.05200  | 0.01000  | 0.04200    | 0.2118      | 1  | 1  | 0.2804  | 48.00 |
| UREA vs. NaNO <sub>3</sub>                         | 0.01500  | 0.01000  | 0.005000   | 0.2118      | 1  | 1  | 0.03338 | 48.00 |

Table S7. Pigments variation between the green and the red phase

| Tukey's multiple comparisons test                                 | Mean Diff. | 95.00% CI of diff. | Significant? | Summary | Adjusted P Value | SE of diff. | N1 | N2 | q        | DF |
|-------------------------------------------------------------------|------------|--------------------|--------------|---------|------------------|-------------|----|----|----------|----|
| Lutein                                                            |            |                    |              |         |                  |             |    |    |          |    |
| NaNO <sub>3</sub> vs. NaNO <sub>3 red</sub>                       | 0.03243    | -0.6597 to 0.7246  | No           | ns      | >0.9999          | 0.2234      | 1  | 1  | 0.2053   | 96 |
| FeNO <sub>3</sub> vs. FeNO <sub>3 red</sub>                       | -0.00717   | -0.6993 to 0.6850  | No           | ns      | >0.9999          | 0.2234      | 1  | 1  | 0.04538  | 96 |
| UREA vs. Urea red                                                 | 0.2748     | -0.4174 to 0.9669  | No           | ns      | 0.9209           | 0.2234      | 1  | 1  | 1.74     | 96 |
| NH <sub>4</sub> <sup>+</sup> vs. NH <sub>4</sub> <sup>+</sup> red | 0.02902    | -0.6631 to 0.7212  | No           | ns      | >0.9999          | 0.2234      | 1  | 1  | 0.1837   | 96 |
| Astaxanthin                                                       |            |                    |              |         |                  |             |    |    |          |    |
| NaNO <sub>3</sub> vs. NaNO <sub>3 red</sub>                       | -0.484     | -1.176 to 0.2081   | No           | ns      | 0.3809           | 0.2234      | 1  | 1  | 3.065    | 96 |
| FeNO <sub>3</sub> vs. FeNO <sub>3 red</sub>                       | 1.361      | 0.6693 to 2.054    | Yes          | ****    | <0.0001          | 0.2234      | 1  | 1  | 8.62     | 96 |
| UREA vs. Urea red                                                 | -0.313     | -1.005 to 0.3791   | No           | ns      | 0.8545           | 0.2234      | 1  | 1  | 1.982    | 96 |
| NH <sub>4</sub> <sup>+</sup> vs. NH <sub>4</sub> <sup>+</sup> red | -0.1867    | -0.8789 to 0.5054  | No           | ns      | 0.9906           | 0.2234      | 1  | 1  | 1.182    | 96 |
| Chla                                                              |            |                    |              |         |                  |             |    |    |          |    |
| NaNO <sub>3</sub> vs. NaNO <sub>3 red</sub>                       | 1.87       | 1.178 to 2.562     | Yes          | ****    | <0.0001          | 0.2234      | 1  | 1  | 11.84    | 96 |
| FeNO <sub>3</sub> vs. FeNO <sub>3 red</sub>                       | 1.058      | 0.3663 to 1.751    | Yes          | ***     | 0.0002           | 0.2234      | 1  | 1  | 6.702    | 96 |
| UREA vs. Urea red                                                 | 2.031      | 1.339 to 2.723     | Yes          | ****    | <0.0001          | 0.2234      | 1  | 1  | 12.86    | 96 |
| NH <sub>4</sub> <sup>+</sup> vs. NH <sub>4</sub> <sup>+</sup> red | -0.2635    | -0.9557 to 0.4286  | No           | ns      | 0.9358           | 0.2234      | 1  | 1  | 1.669    | 96 |
| B-carotene                                                        |            |                    |              |         |                  |             |    |    |          |    |
| NaNO <sub>3</sub> vs. NaNO <sub>3 red</sub>                       | -0.00033   | -0.6925 to 0.6918  | No           | ns      | >0.9999          | 0.2234      | 1  | 1  | 0.002058 | 96 |
| FeNO <sub>3</sub> vs. FeNO <sub>3 red</sub>                       | 0.001833   | -0.6903 to 0.6940  | No           | ns      | >0.9999          | 0.2234      | 1  | 1  | 0.01161  | 96 |
| UREA vs. Urea red                                                 | 0.08692    | -0.6052 to 0.7791  | No           | ns      | >0.9999          | 0.2234      | 1  | 1  | 0.5504   | 96 |
| NH <sub>4</sub> <sup>+</sup> vs. NH <sub>4</sub> <sup>+</sup> red | -0.00979   | -0.7019 to 0.6824  | No           | ns      | >0.9999          | 0.2234      | 1  | 1  | 0.06196  | 96 |
| Pheophytin a                                                      |            |                    |              |         |                  |             |    |    |          |    |
| NaNO <sub>3</sub> vs. NaNO <sub>3 red</sub>                       | 0.269      | -0.4231 to 0.9612  | No           | ns      | 0.9287           | 0.2234      | 1  | 1  | 1.703    | 96 |
| FeNO <sub>3</sub> vs. FeNO <sub>3 red</sub>                       | 0.8512     | 0.1591 to 1.543    | Yes          | **      | 0.0058           | 0.2234      | 1  | 1  | 5.39     | 96 |
| UREA vs. Urea red                                                 | 0.3246     | -0.3676 to 1.017   | No           | ns      | 0.8297           | 0.2234      | 1  | 1  | 2.055    | 96 |
| NH <sub>4</sub> <sup>+</sup> vs. NH <sub>4</sub> <sup>+</sup> red | -0.3945    | -1.087 to 0.2976   | No           | ns      | 0.6439           | 0.2234      | 1  | 1  | 2.498    | 96 |
| Antheraxanthin                                                    |            |                    |              |         |                  |             |    |    |          |    |
| NaNO <sub>3</sub> vs. NaNO <sub>3 red</sub>                       | -0.01      | -0.7021 to 0.6821  | No           | ns      | >0.9999          | 0.2234      | 1  | 1  | 0.06332  | 96 |
| FeNO <sub>3</sub> vs. FeNO <sub>3 red</sub>                       | 0          | -0.6921 to 0.6921  | No           | ns      | >0.9999          | 0.2234      | 1  | 1  | 0        | 96 |
| UREA vs. Urea red                                                 | 0.2789     | -0.4132 to 0.9710  | No           | ns      | 0.9149           | 0.2234      | 1  | 1  | 1.766    | 96 |

| Sidak's multiple comparisons test                                 |        | SE of diff.       | N1 | N2 | t       | DF                   |
|-------------------------------------------------------------------|--------|-------------------|----|----|---------|----------------------|
| car/chl green<br>- car/chl red                                    |        |                   |    |    |         |                      |
| NaNO <sub>3</sub>                                                 |        | 0.1373            | 1  | 1  | 6.159   | 16.00                |
| FeNO <sub>3</sub>                                                 |        | 0.1373            | 1  | 1  | 1.145   | 16.00                |
| UREA                                                              |        | 0.1373            | 1  | 1  | 11.26   | 16.00                |
| NH <sub>4</sub> <sup>+</sup>                                      |        | 0.1373            | 1  | 1  | 0.6738  | 16.00                |
| NH <sub>4</sub> <sup>+</sup> vs. NH <sub>4</sub> <sup>+</sup> red | -0.052 | -0.7441 to 0.6401 | No | ns | >0.9999 | 0.2234 1 1 0.3292 96 |

Table S8. Ordinary two-way ANOVA and Sidak's multiple comparison test, with individual variances computed for each comparison, were performed.

| Test details                                       | Mean 1 | Mean 2 | Mean Diff. | SE of diff. | N1 | N2 | t      | DF |
|----------------------------------------------------|--------|--------|------------|-------------|----|----|--------|----|
| car/chl green                                      |        |        |            |             |    |    |        |    |
| NaNO <sub>3</sub> vs. FeNO <sub>3</sub>            | 0.12   | 1.033  | -0.9134    | 0.1373      | 1  | 1  | 6.654  | 16 |
| NaNO <sub>3</sub> vs. UREA                         | 0.12   | 0.2993 | -0.1793    | 0.1373      | 1  | 1  | 1.306  | 16 |
| NaNO <sub>3</sub> vs. NH <sub>4</sub> <sup>+</sup> | 0.12   | 0.3401 | -0.2201    | 0.1373      | 1  | 1  | 1.603  | 16 |
| FeNO <sub>3</sub> vs. UREA                         | 1.033  | 0.2993 | 0.7342     | 0.1373      | 1  | 1  | 5.348  | 16 |
| FeNO <sub>3</sub> vs. NH <sub>4</sub> <sup>+</sup> | 1.033  | 0.3401 | 0.6933     | 0.1373      | 1  | 1  | 5.05   | 16 |
| UREA vs. NH <sub>4</sub> <sup>+</sup>              | 0.2993 | 0.3401 | -0.04082   | 0.1373      | 1  | 1  | 0.2974 | 16 |
| car/chl red                                        |        |        |            |             |    |    |        |    |
| NaNO <sub>3</sub> vs. FeNO <sub>3</sub>            | 0.9655 | 0.8762 | 0.08931    | 0.1373      | 1  | 1  | 0.6506 | 16 |
| NaNO <sub>3</sub> vs. UREA                         | 0.9655 | 1.845  | -0.8795    | 0.1373      | 1  | 1  | 6.407  | 16 |
| NaNO <sub>3</sub> vs. NH <sub>4</sub> <sup>+</sup> | 0.9655 | 0.4326 | 0.5329     | 0.1373      | 1  | 1  | 3.882  | 16 |
| FeNO <sub>3</sub> vs. UREA                         | 0.8762 | 1.845  | -0.9688    | 0.1373      | 1  | 1  | 7.057  | 16 |
| FeNO <sub>3</sub> vs. NH <sub>4</sub> <sup>+</sup> | 0.8762 | 0.4326 | 0.4436     | 0.1373      | 1  | 1  | 3.231  | 16 |
| UREA vs. NH <sub>4</sub> <sup>+</sup>              | 1.845  | 0.4326 | 1.412      | 0.1373      | 1  | 1  | 10.29  | 16 |

Table S9. Carotenoids/Chlorophylls ratio analysis between the green and the red phase

| Sidak's multiple comparisons test | Mean Diff. | 95.00% CI of diff. | Significant? | Summary | Adjusted P Value | Mean 1 | Mean 2 | Mean Diff. |
|-----------------------------------|------------|--------------------|--------------|---------|------------------|--------|--------|------------|
| car/chl green<br>- car/chl red    |            |                    |              |         |                  |        |        |            |
| NaNO <sub>3</sub>                 | -0.8455    | -1.230 to -0.4606  | Yes          | ****    | <0.0001          | 0.1200 | 0.9655 | -0.8455    |
| FeNO <sub>3</sub>                 | 0.1572     | -0.2277 to 0.5421  | No           | ns      | 0.7143           | 1.033  | 0.8762 | 0.1572     |
| UREA                              | -1.546     | -1.931 to -1.161   | Yes          | ****    | <0.0001          | 0.2993 | 1.845  | -1.546     |
| NH <sub>4</sub> <sup>+</sup>      | -0.09250   | -0.4774 to 0.2924  | No           | ns      | 0.9424           | 0.3401 | 0.4326 | -0.09250   |
